# Supplementary material for: Response of carbon cycle to drier conditions in the mid-Holocene in central China
Source: PubMed Central journal article supplement (PMC5893629; doi:10.1038/s41467-018-03804-w), 2018-04-10
Supplement: 41467_2018_3804_MOESM1_ESM.pdf [file 41467_2018_3804_MOESM1_ESM.pdf]

## **Supplementary Information**

**Title: Response of Carbon Cycle to Drier Conditions in the Mid-Holocene in Central China**

Huang et al.

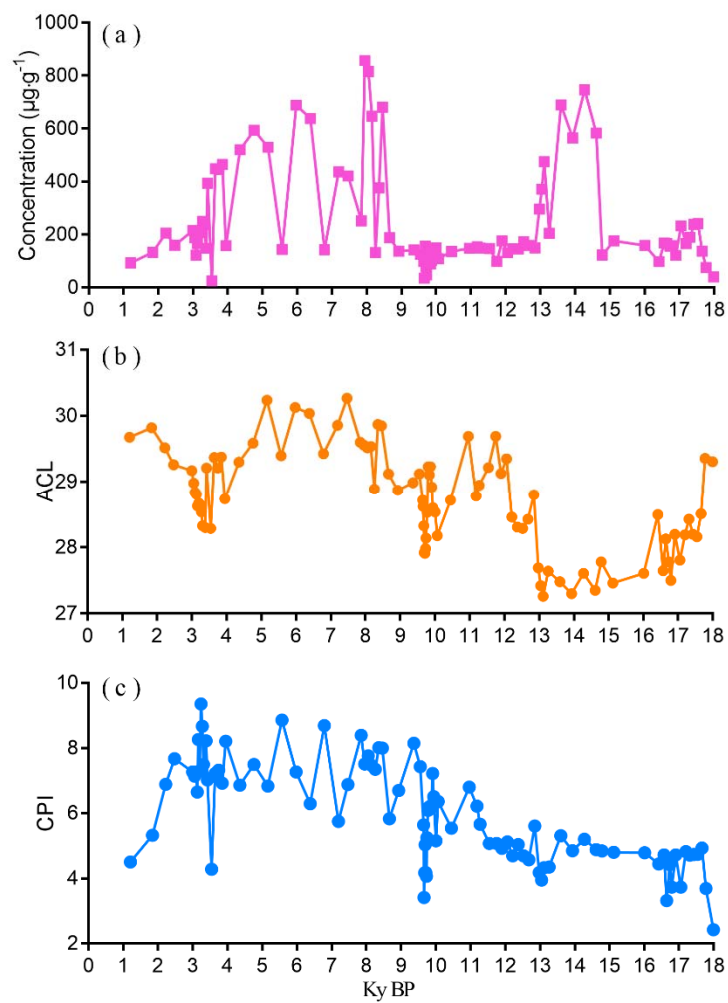

**Supplementary Figure 1. Plots of *n*-alkane concentration and ratios in ZK-5 core. (a) Total alkane concentration. (b) Average chain length (ACL). (c) Carbon preference index (CPI).**

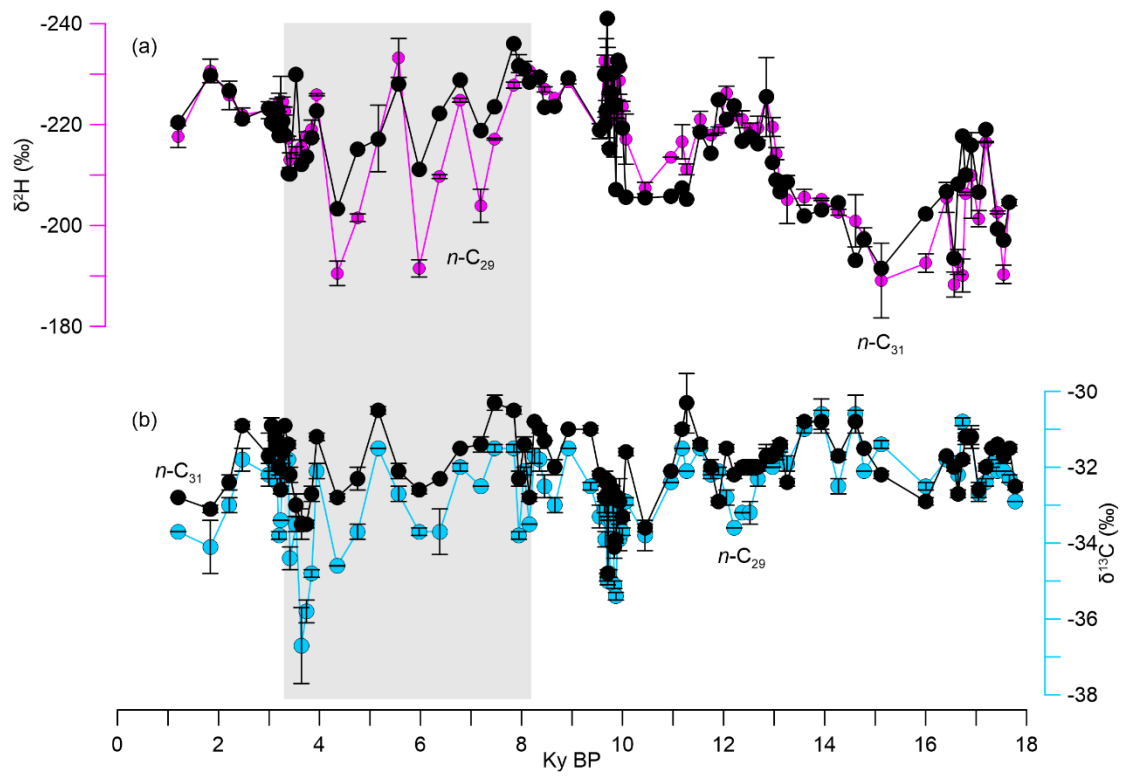

**Supplementary Figure 2. Plots of the  $\delta^2\text{H}$  and  $\delta^{13}\text{C}$  values of  $\text{C}_{29}$  and  $\text{C}_{31}$  *n*-alkanes in ZK-5 core. (a)  $\delta^2\text{H}$  and (b)  $\delta^{13}\text{C}$  values of  $\text{C}_{29}$  and  $\text{C}_{31}$  *n*-alkanes. Error bars represent 1 s.d. of replicate runs. The grey shading infers the drier interval in the mid-Holocene.**

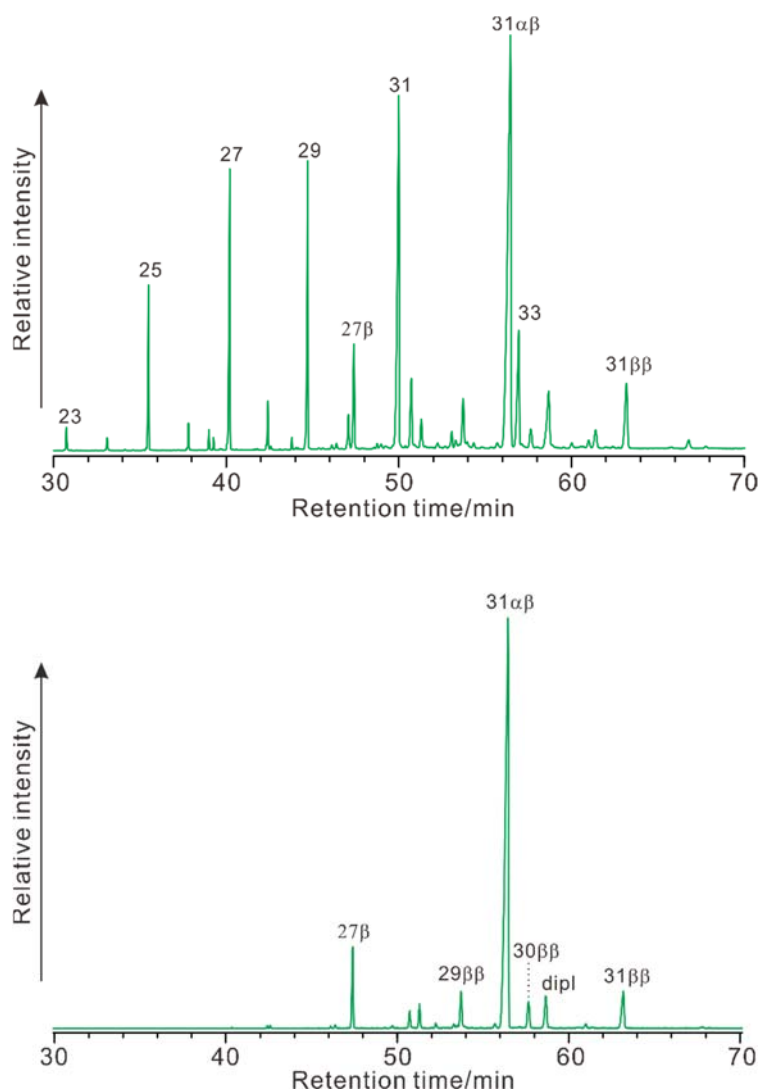

**Supplementary Figure 3. Chromatograms of hopanes in a selected sample from ZK-5 core.** (a) Total ion chromatogram (TIC). (b)  $M/z$  191 mass chromatogram. In the TIC, peaks labeled with Arabic numbers refer to  $n$ -alkanes. Dipl: diploptene. 27 $\beta$ : 17 $\beta$ (H)-trinorhopane. 29 $\beta\beta$ : 17 $\beta$ (H), 22 $\beta$ (H)-norhopane. 31 $\alpha\beta$ : 22R-17 $\alpha$ (H), 22 $\beta$ (H)-homohopane. 30 $\beta\beta$ : 17 $\beta$ (H), 22 $\beta$ (H)-hopane. 31 $\beta\beta$ : 22R-17 $\beta$ (H), 22 $\beta$ (H)-homohopane. Of these, diploptene can be directly biosynthesized whereas the other structures are likely degradation products of biological hopanoids<sup>1</sup>. In the aliphatic fraction of peat extracts, a predominance with C<sub>31</sub>  $\alpha\beta$ -homohopane is a characteristic of acidic peats with pH<6<sup>2</sup>.

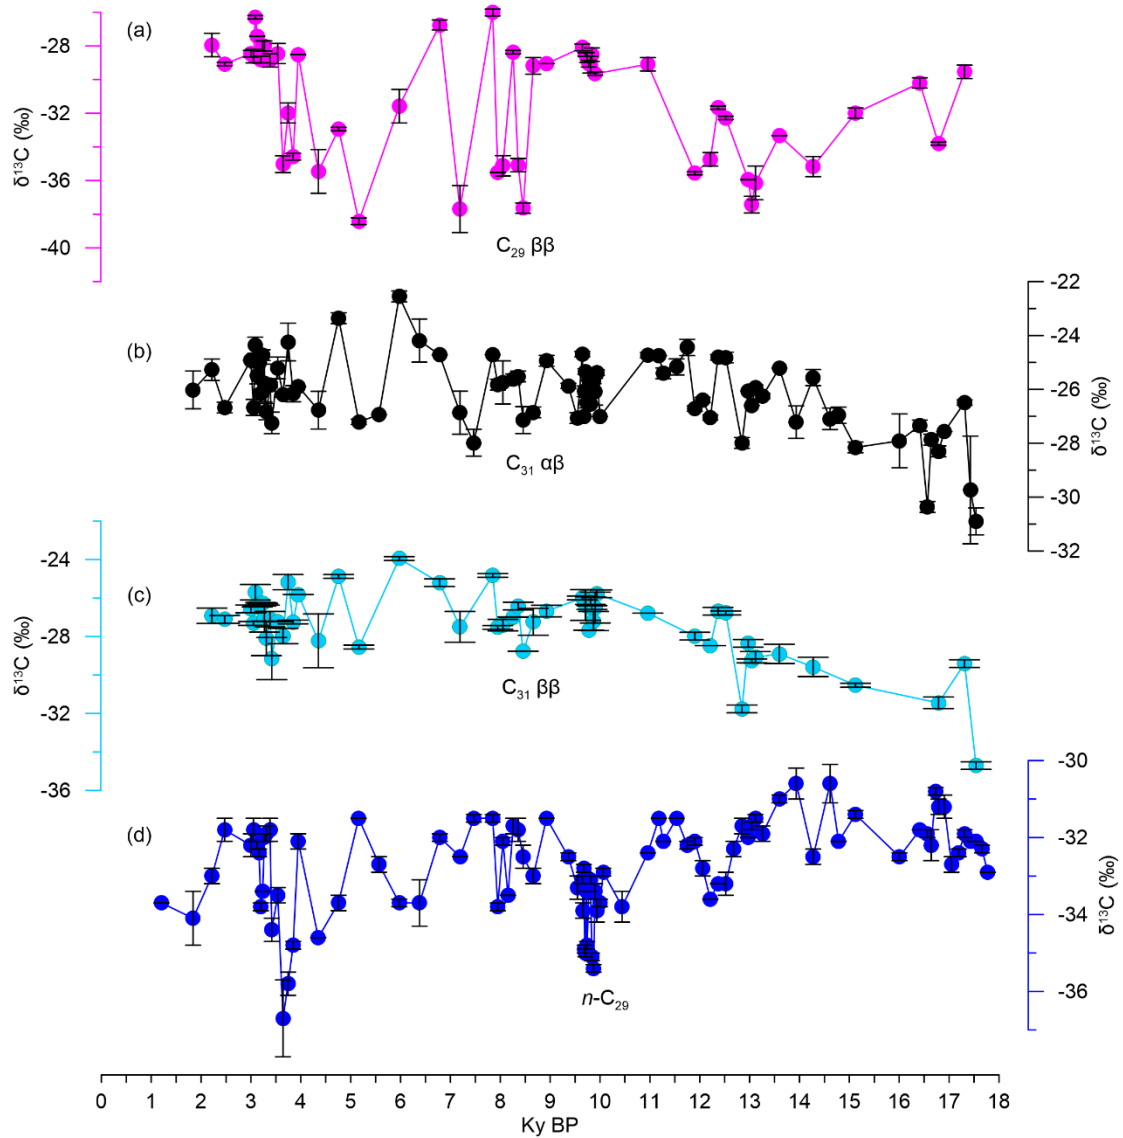

**Supplementary Figure 4. Variations of the lipid  $\delta^{13}\text{C}$  values in ZK-5 core.** (a)  $\text{C}_{29}$   $\beta\beta$  hopane. (b)  $\text{C}_{31}$   $\alpha\beta$  hopane. (c)  $\text{C}_{31}$   $\beta\beta$  hopane. (d)  $\text{C}_{29}$   $n$ -alkane. Error bars represent 1 s.d. of replicate runs.

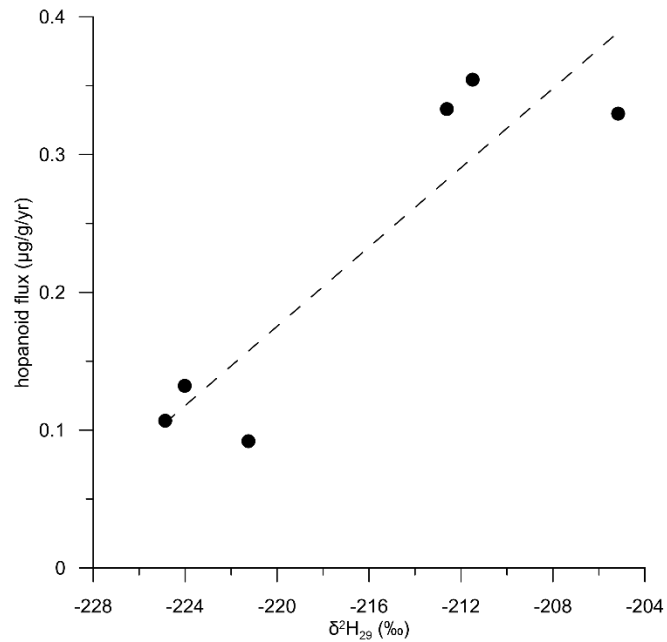

**Supplementary Figure 5. Correlation between averaged  $n\text{-C}_{29}$   $\delta^2\text{H}$  values and the hopanoid flux.** The correlation coefficient ( $r$ ) between  $n\text{-C}_{29}$   $\delta^2\text{H}$  values and the hopanoid abundance is 0.26 ( $p=0.05$ ). However, hopanoid and  $n$ -alkane signals will not be directly correlated in a given horizon due to stratigraphic offsets arising from depth of production, i.e. during a dry and oxidizing interval, enhanced hopanoid production could occur in the peat subsurface. Consequently, the main text emphasizes the broad time interval of variation in all of these parameters. However, if we bundle intervals at 1-3ka, 3-5 ka, 5-7.2ka, 7.2-9.2 ka, 9.2-11.6 ka and 11.6-12.8 ka, then we observe a relatively strong correlation ( $r=0.9$ ), driven largely by data clustering into low hopanoid abundance/low  $\delta^2\text{H}$  and high abundance/high  $\delta^2\text{H}$  groups, thereby confirming the general interpretation in the main text.

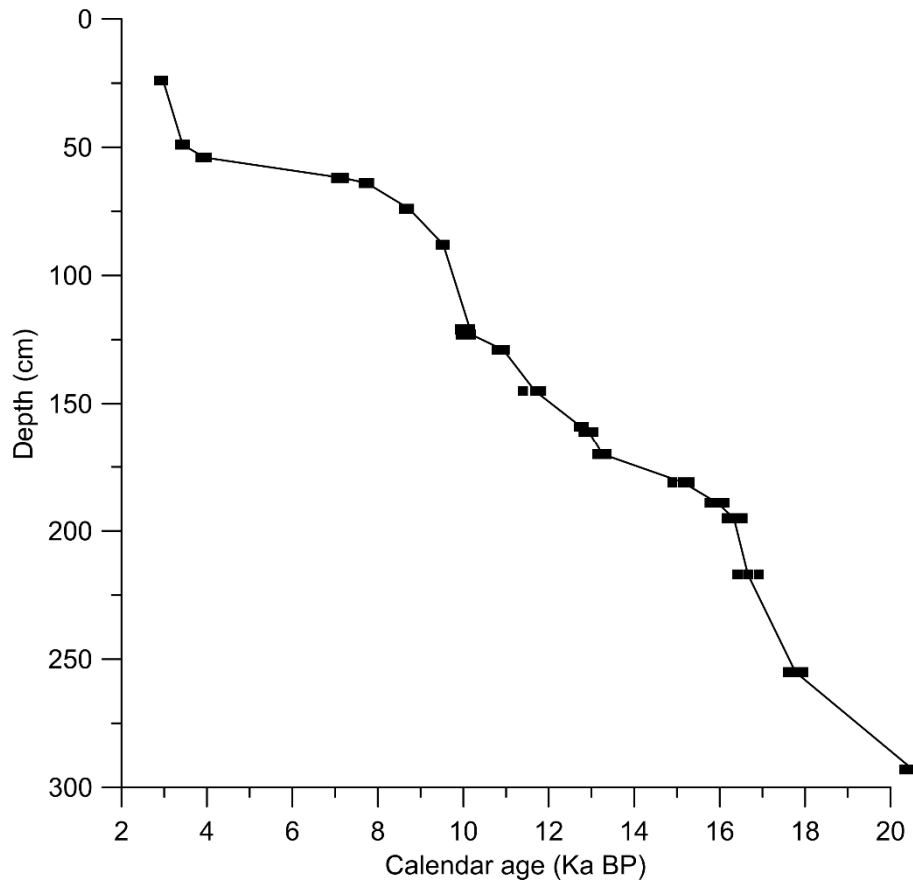

**Supplementary Figure 6. Chronology of the ZK-5 core.** The calendar ages were calibrated using the Clam package with  $2\sigma$  error intervals<sup>3</sup>. The left and right sides of the rectangles represent the lower and upper range of the calendar age, respectively.

**Supplementary Table 1. Hydrogen and oxygen isotope values of precipitation samples collected in Dajiuhu during June and July 2015.**

| Day                         | $\delta^2\text{H}$ (‰)    | $\delta^{18}\text{O}$ (‰) |
|-----------------------------|---------------------------|---------------------------|
| 2015-06-5                   | -80.1                     | -10.4                     |
| 2015-06-16                  | -72.8                     | -10.2                     |
| 2015-06-17(-1) <sup>#</sup> | -72.4/-72.7 <sup>##</sup> | -10.5/-10.6               |
| 2015-06-17(-2)              | -72.3                     | -10.6                     |
| 2015-06-25                  | -85.6/-82.8               | -11.4/-11.2               |
| 2015-07-03                  | -68.0                     | -8.8                      |
| 2015-07-14                  | -102.1                    | -13.9                     |
| 2015-07-15                  | -102.5/-103.5             | -14.1/-13.9               |

<sup>#</sup>: two rainfall water samples were collected on 17<sup>th</sup> June 2015.

<sup>##</sup>: repeated measurement.



**Supplementary Table 2. Concentrations of *n*-alkanes ( $\mu\text{g/g}$  dry weight) and TOC content in the samples retrieved from the ZK-5 core.**

| Age/ka | TOC/% | C <sub>21</sub> | C <sub>22</sub> | C <sub>23</sub> | C <sub>24</sub> | C <sub>25</sub> | C <sub>26</sub> | C <sub>27</sub> | C <sub>28</sub> | C <sub>29</sub> | C <sub>30</sub> | C <sub>31</sub> | C <sub>32</sub> | C <sub>33</sub> |
|--------|-------|-----------------|-----------------|-----------------|-----------------|-----------------|-----------------|-----------------|-----------------|-----------------|-----------------|-----------------|-----------------|-----------------|
| 1.20   | 23.9  | 0.6             | 0.9             | 2.4             | 1.6             | 4.8             | 2.7             | 10.7            | 4.2             | 17.0            | 5.3             | 27.3            | 0.8             | 14.4            |
| 1.84   | 31.0  | 0.8             | 0.9             | 2.3             | 1.6             | 6.3             | 2.6             | 15.5            | 5.2             | 25.6            | 8.3             | 41.7            | 0.6             | 21.4            |
| 2.22   | 45.9  | 2.8             | 1.8             | 9.5             | 3.1             | 14.7            | 3.2             | 21.8            | 6.3             | 35.1            | 5.9             | 58.3            | 3.1             | 39.8            |
| 2.47   | 42.1  | 1.0             | 1.0             | 4.1             | 2.2             | 14.3            | 3.3             | 27.5            | 5.3             | 27.6            | 4.7             | 45.9            | 0.5             | 22.4            |
| 3.00   | 42.7  | 1.6             | 1.4             | 7.2             | 3.2             | 20.0            | 4.4             | 35.5            | 6.9             | 36.3            | 4.4             | 60.8            | 3.8             | 29.5            |
| 3.05   | 41.4  | 1.5             | 1.4             | 6.0             | 2.9             | 18.2            | 4.1             | 36.3            | 7.0             | 32.4            | 5.5             | 48.9            | 0.7             | 23.3            |
| 3.09   | 41.8  | 1.1             | 1.0             | 4.6             | 2.0             | 13.1            | 2.7             | 24.3            | 3.9             | 19.8            | 3.9             | 31.0            | 0.4             | 14.6            |
| 3.13   | 42.3  | 1.4             | 1.7             | 5.7             | 2.8             | 18.4            | 3.8             | 33.5            | 5.4             | 27.7            | 3.7             | 38.9            | 3.0             | 20.0            |
| 3.16   | 42.7  | 1.9             | 1.8             | 8.3             | 3.9             | 25.5            | 5.2             | 45.3            | 6.5             | 34.7            | 3.3             | 48.9            | 0.4             | 22.8            |
| 3.20   | 43.3  | 1.3             | 1.4             | 6.6             | 3.5             | 26.5            | 5.0             | 46.2            | 6.3             | 33.7            | 3.2             | 45.0            | 4.0             | 24.5            |
| 3.24   | 44.1  | 1.3             | 1.3             | 7.0             | 3.5             | 28.8            | 5.1             | 48.1            | 6.0             | 32.8            | 3.0             | 50.4            | 0.3             | 23.6            |
| 3.27   | 44.7  | 1.4             | 1.5             | 8.3             | 4.4             | 34.0            | 6.4             | 60.6            | 8.4             | 41.4            | 3.4             | 53.9            | 0.4             | 26.7            |
| 3.31   | 44.5  | 1.5             | 1.6             | 9.0             | 4.6             | 35.2            | 6.3             | 58.8            | 7.2             | 38.5            | 3.3             | 44.8            | 3.4             | 23.5            |
| 3.38   | 46.8  | 1.5             | 1.5             | 7.7             | 3.4             | 22.4            | 3.9             | 32.7            | 4.0             | 21.2            | 2.3             | 33.7            | 0.2             | 13.2            |
| 3.42   | 43.6  | 4.3             | 3.2             | 18.0            | 7.5             | 48.6            | 8.7             | 68.5            | 8.5             | 44.5            | 11.9            | 60.6            | 2.3             | 106.7           |
| 3.54   | 43.6  | 0.5             | 0.3             | 1.4             | 0.5             | 3.3             | 0.5             | 4.6             | 0.5             | 3.2             | 2.4             | 4.9             | 0.2             | 2.7             |
| 3.64   | 43.6  | 5.6             | 4.0             | 17.9            | 7.4             | 48.6            | 8.3             | 74.4            | 10.2            | 54.3            | 14.2            | 79.1            | 2.8             | 121.8           |
| 3.74   | 43.6  | 5.4             | 4.1             | 18.4            | 7.7             | 51.8            | 9.1             | 76.9            | 10.8            | 55.9            | 13.0            | 81.5            | 2.1             | 108.5           |
| 3.85   | 41.0  | 5.1             | 4.0             | 16.3            | 7.2             | 48.8            | 9.3             | 80.0            | 10.3            | 57.3            | 14.8            | 87.2            | 5.3             | 119.1           |
| 3.95   | 29.3  | 2.2             | 1.6             | 7.0             | 2.8             | 19.7            | 3.4             | 29.7            | 4.0             | 22.6            | 3.4             | 41.9            | 0.9             | 19.2            |
| 4.35   | 40.3  | 7.2             | 4.9             | 21.3            | 8.9             | 59.1            | 10.0            | 86.0            | 11.7            | 60.6            | 17.6            | 91.2            | 3.8             | 137.6           |
| 4.76   | 43.5  | 7.0             | 4.4             | 17.2            | 7.2             | 54.3            | 9.8             | 96.8            | 15.0            | 75.5            | 19.3            | 122.1           | 4.2             | 161.1           |
| 5.16   | 40.1  | 7.0             | 4.2             | 11.6            | 5.3             | 40.7            | 7.3             | 68.3            | 8.6             | 49.2            | 25.8            | 90.2            | 2.6             | 208.4           |

|      |      |     |     |      |      |      |      |       |      |       |      |       |     |       |
|------|------|-----|-----|------|------|------|------|-------|------|-------|------|-------|-----|-------|
| 5.57 | 45.4 | 1.7 | 1.1 | 3.0  | 1.6  | 13.5 | 2.5  | 22.9  | 3.2  | 20.2  | 4.3  | 46.6  | 0.6 | 22.7  |
| 5.97 | 42.2 | 5.7 | 3.6 | 10.5 | 5.7  | 51.2 | 9.8  | 91.5  | 15.6 | 81.5  | 31.5 | 160.3 | 3.5 | 218.7 |
| 6.38 | 42.2 | 5.9 | 3.2 | 9.6  | 5.5  | 48.3 | 9.6  | 86.4  | 16.1 | 75.3  | 35.7 | 147.1 | 4.0 | 191.0 |
| 6.78 | 41.1 | 1.4 | 0.9 | 2.7  | 1.5  | 13.1 | 2.6  | 23.6  | 3.7  | 20.3  | 4.4  | 44.8  | 0.2 | 23.2  |
| 7.19 | 42.2 | 3.4 | 2.3 | 7.6  | 4.3  | 35.7 | 7.2  | 62.3  | 10.6 | 53.0  | 26.1 | 104.5 | 5.6 | 114.8 |
| 7.47 | 41.2 | 2.9 | 2.0 | 7.1  | 3.8  | 29.8 | 6.2  | 51.3  | 9.0  | 48.4  | 20.4 | 91.6  | 2.6 | 146.2 |
| 7.85 | 43.8 | 1.6 | 1.1 | 4.2  | 2.1  | 17.3 | 3.5  | 38.9  | 7.3  | 41.5  | 6.7  | 86.3  | 4.0 | 37.4  |
| 7.95 | 43.3 | 6.3 | 4.0 | 16.9 | 9.8  | 66.3 | 14.7 | 128.5 | 28.6 | 150.1 | 31.1 | 243.5 | 3.1 | 154.3 |
| 8.05 | 44.3 | 5.2 | 5.1 | 20.1 | 10.8 | 63.6 | 16.2 | 119.2 | 31.0 | 151.6 | 19.2 | 225.2 | 2.2 | 146.4 |
| 8.15 | 46.9 | 4.8 | 3.7 | 15.1 | 7.7  | 49.9 | 11.7 | 90.1  | 22.9 | 118.6 | 20.5 | 185.7 | 2.8 | 112.4 |
| 8.26 | 45.1 | 1.4 | 1.0 | 3.8  | 1.9  | 12.8 | 2.7  | 20.9  | 4.8  | 27.3  | 4.5  | 43.8  | 0.4 | 6.7   |
| 8.36 | 45.8 | 2.8 | 2.1 | 8.0  | 4.1  | 25.9 | 6.3  | 48.3  | 11.7 | 63.3  | 11.4 | 100.3 | 1.0 | 91.4  |
| 8.46 | 44.3 | 5.9 | 4.3 | 16.4 | 8.1  | 47.3 | 11.4 | 84.1  | 20.5 | 113.8 | 20.2 | 180.3 | 1.5 | 166.2 |
| 8.66 | 46.1 | 2.2 | 1.7 | 6.0  | 2.9  | 16.4 | 3.6  | 27.3  | 9.4  | 35.7  | 4.9  | 52.3  | 3.3 | 22.0  |
| 8.93 | 47.2 | 2.7 | 1.9 | 7.6  | 2.8  | 13.4 | 2.6  | 16.2  | 4.3  | 25.0  | 5.0  | 42.4  | 0.1 | 13.2  |
| 9.37 | 42.8 | 1.6 | 1.8 | 6.0  | 2.3  | 11.9 | 2.6  | 27.5  | 3.3  | 24.2  | 4.3  | 37.5  | 0.1 | 19.0  |
| 9.55 | 38.5 | 2.4 | 1.8 | 5.8  | 2.1  | 9.1  | 2.7  | 19.7  | 3.5  | 22.5  | 3.3  | 32.0  | 0.2 | 19.9  |
| 9.64 | 47.8 | 1.7 | 1.0 | 6.5  | 1.8  | 9.1  | 2.0  | 12.9  | 3.1  | 17.4  | 4.2  | 26.5  | 1.7 | 9.6   |
| 9.66 | 48.1 | 1.1 | 0.5 | 2.9  | 1.8  | 3.3  | 0.5  | 3.2   | 1.3  | 3.9   | 2.7  | 9.3   | 0.6 | 4.2   |
| 9.68 | 45.5 | 2.0 | 1.3 | 7.6  | 2.8  | 11.2 | 2.7  | 16.3  | 6.8  | 18.5  | 3.2  | 19.4  | 2.2 | 10.8  |
| 9.69 | 47.7 | 3.9 | 3.8 | 14.5 | 6.1  | 21.2 | 4.8  | 24.4  | 6.8  | 26.3  | 3.0  | 28.7  | 0.1 | 13.1  |
| 9.71 | 47.1 | 2.0 | 1.9 | 7.1  | 2.9  | 10.3 | 2.3  | 11.8  | 2.8  | 12.1  | 3.0  | 15.1  | 1.4 | 5.8   |
| 9.73 |      | 1.3 | 1.2 | 4.7  | 1.8  | 6.0  | 1.3  | 6.0   | 1.4  | 6.9   | 3.1  | 10.0  | 0.1 | 3.9   |
| 9.74 | 45.0 | 2.5 | 2.2 | 9.3  | 3.8  | 14.7 | 3.5  | 20.4  | 4.4  | 19.5  | 3.3  | 22.2  | 0.4 | 11.3  |
| 9.77 | 44.0 | 2.2 | 1.5 | 7.4  | 3.8  | 13.0 | 2.6  | 17.6  | 3.5  | 20.1  | 3.3  | 25.9  | 0.3 | 12.8  |

|       |      |      |      |      |      |      |      |       |      |       |      |       |     |      |
|-------|------|------|------|------|------|------|------|-------|------|-------|------|-------|-----|------|
| 9.81  | 45.1 | 2.0  | 1.2  | 8.0  | 2.6  | 2.1  | 2.7  | 19.1  | 4.1  | 27.4  | 4.7  | 35.8  | 1.0 | 16.0 |
| 9.84  | 46.1 | 1.5  | 0.8  | 4.4  | 1.5  | 8.0  | 1.8  | 11.3  | 2.5  | 15.0  | 3.6  | 24.6  | 1.2 | 13.1 |
| 9.87  | 46.2 | 2.5  | 1.6  | 4.7  | 2.0  | 8.5  | 2.2  | 12.2  | 3.1  | 17.1  | 3.5  | 25.9  | 0.2 | 18.5 |
| 9.90  | 45.6 | 2.0  | 1.4  | 8.2  | 2.7  | 13.0 | 2.7  | 18.3  | 3.8  | 23.7  | 3.8  | 36.0  | 0.8 | 18.1 |
| 9.94  | 44.9 | 2.8  | 1.3  | 11.3 | 2.6  | 13.3 | 2.3  | 17.1  | 3.3  | 25.0  | 5.6  | 34.8  | 1.9 | 15.0 |
| 10.00 | 46.9 | 2.5  | 3.0  | 6.9  | 4.2  | 14.2 | 4.0  | 30.6  | 4.8  | 26.5  | 3.6  | 31.1  | 3.4 | 14.7 |
| 10.07 | 46.2 | 2.0  | 2.1  | 6.0  | 2.9  | 13.5 | 2.2  | 25.6  | 2.4  | 16.9  | 3.2  | 21.2  | 1.1 | 9.5  |
| 10.44 | 45.2 | 2.7  | 1.5  | 11.0 | 2.5  | 11.8 | 2.8  | 16.7  | 6.4  | 25.9  | 3.9  | 30.0  | 2.0 | 19.0 |
| 10.96 | 46.7 | 2.3  | 1.3  | 8.2  | 2.2  | 9.8  | 2.2  | 12.2  | 3.7  | 23.9  | 4.6  | 39.5  | 2.6 | 35.6 |
| 11.18 | 46.0 | 3.1  | 1.5  | 10.7 | 3.3  | 20.7 | 2.3  | 14.0  | 4.6  | 27.7  | 5.2  | 31.8  | 2.4 | 26.8 |
| 11.27 | 37.0 | 2.3  | 1.4  | 7.8  | 2.9  | 17.0 | 3.0  | 18.4  | 9.0  | 26.9  | 3.1  | 30.7  | 0.8 | 25.5 |
| 11.54 | 34.5 | 2.2  | 1.8  | 6.0  | 2.6  | 12.1 | 2.7  | 17.7  | 8.8  | 28.0  | 4.1  | 35.6  | 2.1 | 23.4 |
| 11.75 | 29.3 | 1.0  | 0.5  | 2.2  | 1.0  | 5.7  | 1.3  | 9.2   | 4.9  | 18.7  | 6.1  | 34.2  | 1.4 | 12.9 |
| 11.90 | 30.6 | 2.2  | 1.7  | 5.1  | 3.4  | 11.5 | 2.8  | 21.1  | 10.5 | 36.4  | 6.1  | 63.2  | 4.3 | 7.4  |
| 12.06 | 28.3 | 1.4  | 1.2  | 3.8  | 1.7  | 8.1  | 2.4  | 16.6  | 8.5  | 28.0  | 5.1  | 38.0  | 1.1 | 15.5 |
| 12.21 | 42.0 | 3.1  | 3.0  | 7.7  | 5.1  | 15.2 | 3.5  | 26.3  | 5.6  | 25.5  | 4.5  | 29.4  | 2.5 | 15.0 |
| 12.37 | 38.6 | 3.5  | 2.6  | 9.6  | 4.9  | 15.6 | 3.2  | 24.3  | 5.4  | 26.1  | 4.2  | 30.4  | 2.4 | 12.9 |
| 12.52 | 28.8 | 3.7  | 2.7  | 10.4 | 5.8  | 18.8 | 4.2  | 28.1  | 6.6  | 32.9  | 6.8  | 40.4  | 3.2 | 9.8  |
| 12.68 | 33.0 | 3.0  | 2.2  | 8.3  | 4.3  | 17.8 | 4.2  | 23.0  | 7.3  | 31.3  | 6.4  | 38.4  | 3.0 | 9.7  |
| 12.85 | 30.1 | 1.4  | 1.5  | 6.0  | 3.4  | 16.0 | 4.0  | 24.5  | 6.1  | 29.9  | 3.6  | 33.6  | 2.7 | 17.0 |
| 12.97 | 31.1 | 6.0  | 6.3  | 20.0 | 11.3 | 44.8 | 10.2 | 56.4  | 12.7 | 51.5  | 10.3 | 51.1  | 4.9 | 10.6 |
| 13.04 | 31.0 | 12.2 | 9.2  | 28.8 | 14.2 | 55.7 | 13.8 | 70.1  | 14.6 | 61.6  | 13.7 | 59.6  | 7.1 | 10.8 |
| 13.12 | 32.0 | 22.7 | 13.6 | 39.9 | 18.3 | 69.1 | 17.6 | 87.4  | 15.5 | 78.8  | 14.6 | 83.1  | 6.7 | 7.8  |
| 13.26 | 23.5 | 8.0  | 6.6  | 18.2 | 8.2  | 27.4 | 7.5  | 35.1  | 7.2  | 31.8  | 2.7  | 33.6  | 3.9 | 14.4 |
| 13.60 | 25.3 | 29.8 | 22.2 | 60.3 | 25.6 | 92.3 | 25.2 | 127.3 | 26.9 | 123.6 | 5.1  | 133.0 | 0.4 | 18.1 |

|       |      |      |      |      |      |      |      |       |      |       |     |       |      |      |
|-------|------|------|------|------|------|------|------|-------|------|-------|-----|-------|------|------|
| 13.94 | 26.8 | 22.3 | 19.7 | 53.6 | 25.3 | 80.9 | 22.3 | 107.9 | 21.9 | 97.8  | 3.5 | 96.3  | 0.9  | 11.9 |
| 14.27 | 22.3 | 23.9 | 23.1 | 61.2 | 27.8 | 96.9 | 29.0 | 141.9 | 32.9 | 142.6 | 4.2 | 149.9 | 0.5  | 13.1 |
| 14.61 | 21.0 | 23.0 | 22.3 | 56.1 | 23.9 | 78.8 | 22.4 | 109.5 | 23.1 | 103.1 | 4.5 | 107.3 | 0.4  | 8.8  |
| 14.78 | 24.9 | 4.1  | 3.9  | 10.6 | 4.5  | 17.2 | 4.1  | 19.6  | 4.3  | 19.6  | 2.4 | 23.8  | 0.9  | 7.8  |
| 15.12 | 26.9 | 7.2  | 6.3  | 18.0 | 7.4  | 24.4 | 6.5  | 29.9  | 6.2  | 29.5  | 2.0 | 28.7  | 0.5  | 9.5  |
| 16.01 | 18.0 | 6.0  | 5.5  | 15.5 | 6.3  | 19.6 | 5.8  | 27.2  | 5.6  | 27.0  | 2.3 | 29.2  | 0.7  | 7.8  |
| 16.41 | 18.4 | 4.3  | 2.1  | 6.9  | 2.4  | 7.8  | 2.6  | 11.0  | 2.9  | 15.4  | 2.9 | 27.5  | 3.9  | 8.4  |
| 16.57 | 18.5 | 6.0  | 5.7  | 15.8 | 6.2  | 23.0 | 5.8  | 26.9  | 5.7  | 28.4  | 2.6 | 31.2  | 2.2  | 8.9  |
| 16.64 | 18.6 | 5.4  | 3.9  | 12.0 | 4.9  | 15.0 | 5.7  | 23.2  | 5.7  | 29.4  | 2.7 | 34.7  | 13.9 | 9.9  |
| 16.73 | 12.0 | 4.5  | 4.5  | 12.7 | 5.4  | 17.9 | 7.0  | 29.2  | 6.3  | 29.4  | 2.5 | 27.8  | 2.0  | 7.2  |
| 16.79 | 20.1 | 6.6  | 5.9  | 15.0 | 5.8  | 18.6 | 5.6  | 25.2  | 5.4  | 27.1  | 2.5 | 26.5  | 6.8  | 6.6  |
| 16.90 | 28.6 | 4.0  | 3.2  | 9.1  | 3.5  | 13.2 | 3.4  | 16.1  | 3.8  | 22.2  | 4.1 | 28.1  | 2.1  | 8.6  |
| 17.05 | 14.4 | 10.0 | 8.8  | 21.4 | 8.3  | 23.3 | 7.1  | 32.3  | 7.0  | 38.3  | 1.5 | 48.7  | 14.1 | 12.0 |
| 17.19 | 16.9 | 5.7  | 5.9  | 13.6 | 5.3  | 17.5 | 4.3  | 20.4  | 4.7  | 31.6  | 4.2 | 37.9  | 2.6  | 12.3 |
| 17.31 | 15.3 | 5.0  | 5.7  | 13.7 | 5.7  | 18.9 | 4.9  | 23.9  | 5.8  | 34.7  | 8.7 | 46.1  | 0.5  | 15.7 |
| 17.43 | 13.2 | 6.7  | 7.7  | 18.1 | 7.8  | 28.8 | 6.9  | 30.8  | 7.6  | 43.8  | 9.1 | 52.6  | 0.4  | 18.3 |
| 17.54 | 7.9  | 7.3  | 8.8  | 20.0 | 8.1  | 25.9 | 7.2  | 32.2  | 7.9  | 45.3  | 7.8 | 53.2  | 0.2  | 17.7 |
| 17.66 | 7.2  | 2.8  | 3.0  | 8.4  | 3.6  | 15.0 | 3.6  | 17.9  | 4.0  | 26.5  | 7.6 | 32.9  | 0.2  | 11.6 |

**Supplementary Table 3. The  $\delta^2\text{H}$  and  $\delta^{13}\text{C}$  values (‰) of  $\text{C}_{29}$  and  $\text{C}_{31}$  *n*-alkanes in ZK-5 core.**

SD refers the standard deviation of replicate runs.

| Age/ka BP | $\delta^{13}\text{C}_{29}$ | SD  | $\delta^{13}\text{C}_{31}$ | SD  | $\delta^2\text{H}_{29}$ | SD | $\delta^2\text{H}_{31}$ | SD |
|-----------|----------------------------|-----|----------------------------|-----|-------------------------|----|-------------------------|----|
| 1.20      | -33.7                      | 0.0 | -32.8                      | 0.0 | -218                    | 2  | -220                    | 2  |
| 1.84      | -34.1                      | 0.7 | -33.1                      | 0.1 | -231                    | 7  | -230                    | 2  |
| 2.22      | -33.0                      | 0.2 | -32.4                      | 0.2 | -226                    | 2  | -227                    | 3  |
| 2.47      | -31.8                      | 0.3 | -30.9                      | 0.1 | -222                    | 2  | -221                    | 1  |
| 3.00      | -32.2                      | 0.3 | -31.7                      | 0.6 | -223                    | 1  | -223                    | 2  |
| 3.05      | -31.8                      | 0.3 | -30.9                      | 0.2 | -222                    | 0  | -220                    | 0  |
| 3.09      | -32.5                      | 0.3 | -31.8                      | 0.2 |                         |    |                         |    |
| 3.13      | -32.2                      | 0.1 | -31.2                      | 0.1 | -222                    | 3  | -220                    | 2  |
| 3.16      | -32.4                      | 0.1 | -31.4                      | 0.0 | -224                    | 1  | -223                    | 1  |
| 3.20      | -33.8                      | 0.1 | -32.0                      | 0.2 | -224                    | 3  | -218                    | 2  |
| 3.24      | -33.4                      | 0.0 | -32.6                      | 0.1 | -224                    | 3  | -219                    | 6  |
| 3.27      | -32.0                      | 0.1 | -31.6                      | 0.0 | -225                    | 4  | -221                    | 1  |
| 3.31      | -31.9                      | 0.2 | -30.9                      | 0.0 | -223                    | 3  | -218                    | 1  |
| 3.38      | -31.8                      | 0.3 | -31.4                      | 0.1 | -217                    | 5  | -210                    | 0  |
| 3.42      | -34.4                      | 0.3 | -32.2                      | 0.2 | -213                    | 0  | -210                    | 1  |
| 3.54      | -33.5                      | 0.2 | -33.0                      | 0.3 | -214                    | 2  | -230                    | 1  |
| 3.64      | -36.7                      | 1.0 | -33.5                      | 0.4 | -215                    | 1  | -212                    | 2  |
| 3.74      | -35.8                      | 0.3 | -33.5                      | 0.1 | -218                    | 3  | -214                    | 1  |
| 3.85      | -34.8                      | 0.1 | -32.7                      | 0.2 | -219                    | 1  | -217                    | 2  |
| 3.95      | -32.1                      | 0.2 | -31.2                      | 0.1 | -226                    | 1  | -223                    | 0  |
| 4.35      | -34.6                      | 0.0 | -32.8                      | 0.1 | -191                    | 0  | -203                    | 2  |
| 4.76      | -33.7                      | 0.2 | -32.3                      | 0.3 | -202                    | 1  | -215                    | 1  |
| 5.16      | -31.5                      | 0.0 | -30.5                      | 0.1 | -217                    | 7  | -217                    | 7  |
| 5.57      | -32.7                      | 0.2 | -32.1                      | 0.2 | -233                    | 0  | -228                    | 4  |
| 5.97      | -33.7                      | 0.1 | -32.6                      | 0.1 | -192                    | 7  | -211                    | 2  |
| 6.38      | -33.7                      | 0.6 | -32.3                      | 0.0 | -210                    | 4  | -222                    | 0  |
| 6.78      | -32.0                      | 0.1 | -31.5                      | 0.0 | -225                    | 0  | -229                    | 0  |
| 7.19      | -32.5                      | 0.0 | -31.4                      | 0.2 | -204                    | 2  | -219                    | 3  |
| 7.47      | -31.5                      | 0.1 | -30.3                      | 0.2 | -217                    | 0  | -224                    | 0  |
| 7.85      | -31.5                      | 0.1 | -30.5                      | 0.1 | -228                    | 2  | -236                    | 1  |
| 7.95      | -33.8                      | 0.1 | -32.3                      | 0.2 | -232                    | 1  | -232                    | 2  |
| 8.05      | -32.1                      | 0.1 | -31.4                      | 0.2 | -231                    | 1  | -231                    | 1  |
| 8.15      | -33.5                      | 0.0 | -32.8                      | 0.1 | -231                    | 2  | -228                    | 0  |
| 8.26      | -31.7                      | 0.2 | -30.8                      | 0.0 |                         |    |                         |    |
| 8.36      | -31.8                      | 0.3 | -31.0                      | 0.1 | -230                    | 1  | -229                    | 0  |
| 8.46      | -32.5                      | 0.3 | -31.3                      | 0.0 | -227                    | 1  | -223                    | 1  |
| 8.66      | -33.0                      | 0.2 | -32.0                      | 0.2 | -225                    |    | -224                    |    |
| 8.93      | -31.5                      | 0.0 | -31.0                      | 0.0 | -228                    | 1  | -229                    | 0  |
| 9.37      | -32.5                      | 0.1 | -31.0                      | 0.1 |                         |    |                         |    |

---

|       |       |     |       |     |      |   |      |   |
|-------|-------|-----|-------|-----|------|---|------|---|
| 9.55  | -33.3 | 0.3 | -32.2 | 0.1 | -219 | 5 | -219 | 1 |
| 9.64  | -33.1 | 0.1 | -32.8 | 0.1 | -233 | 3 | -230 | 1 |
| 9.66  | -33.9 | 0.2 | -32.3 | 0.2 | -222 | 1 | -220 | 1 |
| 9.68  | -32.8 | 0.1 | -32.4 | 0.1 | -231 | 3 | -223 | 6 |
| 9.69  | -34.9 | 0.1 | -32.8 | 0.5 | -221 |   | -241 |   |
| 9.71  | -35.0 | 0.1 | -34.8 | 0.1 | -226 | 4 | -230 | 9 |
| 9.73  | -33.4 | 0.0 | -32.7 | 0.1 |      |   |      |   |
| 9.74  | -34.8 | 0.1 | -32.4 | 0.1 | -221 | 3 | -215 | 5 |
| 9.77  | -33.4 | 0.0 | -32.8 | 0.0 | -229 | 6 | -226 | 3 |
| 9.81  | -33.1 | 0.1 | -32.6 | 0.1 | -226 | 0 | -230 | 1 |
| 9.84  | -35.1 | 0.1 | -34.1 | 0.3 | -222 | 2 | -224 | 8 |
| 9.87  | -35.4 | 0.1 | -33.9 | 0.1 | -221 | 0 | -207 | 0 |
| 9.90  | -33.4 | 0.2 | -32.8 | 0.1 | -223 | 0 | -233 | 2 |
| 9.94  | -33.9 | 0.3 | -32.9 | 0.6 | -229 | 2 | -232 | 3 |
| 10.00 | -33.7 | 0.1 | -33.3 | 0.1 | -224 | 2 | -219 | 1 |
| 10.07 | -32.9 | 0.1 | -31.6 | 0.1 | -217 | 6 | -206 | 5 |
| 10.44 | -33.8 | 0.4 | -33.6 | 0.1 | -207 | 0 | -206 | 1 |
| 10.96 | -32.4 | 0.0 | -32.1 | 0.0 | -214 | 0 | -206 | 0 |
| 11.18 | -31.5 | 0.0 | -31.0 | 0.1 | -217 | 1 | -207 | 3 |
| 11.27 | -32.1 | 0.0 | -30.3 | 0.8 | -211 | 0 | -205 | 1 |
| 11.54 | -31.5 | 0.0 | -31.4 | 0.1 | -221 | 3 | -219 | 2 |
| 11.75 | -32.2 | 0.1 | -32.0 | 0.2 | -218 | 1 | -214 | 0 |
| 11.90 | -32.1 | 0.1 | -32.9 | 0.1 | -219 | 1 | -225 | 1 |
| 12.06 | -32.8 | 0.2 | -31.5 | 0.1 | -226 | 3 | -221 | 1 |
| 12.21 | -33.6 | 0.0 | -32.2 | 0.1 | -222 | 0 | -224 | 0 |
| 12.37 | -33.2 | 0.0 | -32.0 | 0.1 | -221 | 1 | -217 | 2 |
| 12.52 | -33.2 | 0.3 | -32.0 | 0.2 | -219 | 1 | -218 | 1 |
| 12.68 | -32.3 | 0.2 | -32.0 | 0.0 | -219 | 1 | -216 | 2 |
| 12.85 | -31.7 | 0.2 | -31.7 | 0.3 | -225 | 5 | -226 | 8 |
| 12.97 | -32.0 | 0.0 | -31.7 | 0.0 | -220 | 2 | -212 | 2 |
| 13.04 | -31.7 | 0.1 | -31.6 | 0.2 | -214 | 0 | -209 | 1 |
| 13.12 | -31.5 | 0.1 | -31.4 | 0.1 | -209 | 0 | -207 | 1 |
| 13.26 | -31.9 | 0.2 | -32.4 | 0.1 | -205 | 1 | -209 | 5 |
| 13.60 | -31.0 | 0.1 | -30.8 | 0.1 | -206 | 2 | -202 | 2 |
| 13.94 | -30.6 | 0.4 | -30.8 | 0.3 | -205 | 1 | -203 | 0 |
| 14.27 | -32.5 | 0.2 | -31.7 | 0.1 | -203 | 0 | -204 | 1 |
| 14.61 | -30.6 | 0.5 | -30.8 | 0.3 | -201 | 2 | -193 | 5 |
| 14.78 | -32.1 | 0.0 | -31.5 | 0.0 | -198 | 0 | -197 | 2 |
| 15.12 | -31.4 | 0.1 | -32.2 | 0.1 | -189 | 6 | -191 | 7 |
| 16.01 | -32.5 | 0.1 | -32.9 | 0.1 | -193 | 5 | -202 | 2 |
| 16.41 | -31.8 | 0.0 | -31.7 | 0.0 | -206 | 1 | -207 | 3 |
| 16.57 | -31.9 | 0.1 | -32.0 | 0.1 | -188 | 4 | -194 | 2 |

---

---

|       |       |     |       |     |      |   |      |   |
|-------|-------|-----|-------|-----|------|---|------|---|
| 16.64 | -32.2 | 0.4 | -32.7 | 0.1 | -193 | 3 | -208 | 2 |
| 16.73 | -30.8 | 0.1 | -31.8 | 0.1 | -190 | 4 | -218 | 3 |
| 16.79 | -31.2 | 0.2 | -31.2 | 0.1 | -206 | 1 | -210 | 0 |
| 16.90 | -31.2 | 0.3 | -31.2 | 0.2 | -210 | 5 | -216 | 8 |
| 17.05 | -32.7 | 0.2 | -32.6 | 0.2 | -201 | 0 | -207 | 2 |
| 17.19 | -32.4 | 0.1 | -32.0 | 0.1 | -217 | 1 | -219 | 0 |
| 17.31 | -31.9 | 0.1 | -31.5 | 0.0 |      |   |      |   |
| 17.43 | -32.1 | 0.0 | -31.4 | 0.0 | -203 | 1 | -199 | 0 |
| 17.54 | -32.1 | 0.0 | -31.7 | 0.2 | -190 | 1 | -197 | 2 |
| 17.66 | -32.3 | 0.1 | -31.5 | 0.1 | -205 | 1 | -205 | 1 |

---

**Supplementary Table 4. The  $\delta^{13}\text{C}$  values (‰) of hopanes in the samples retrieved from the ZK-5 core. SD refers the standard deviation of replicate runs.**

| age/ka BP | $\delta^{13}\text{C}_{29\beta\beta}$ | SD  | $\delta^{13}\text{C}_{31\alpha\beta}$ | SD  | $\delta^{13}\text{C}_{30\beta\beta}$ | SD  | $\delta^{13}\text{C}_{31\beta\beta}$ | SD  |
|-----------|--------------------------------------|-----|---------------------------------------|-----|--------------------------------------|-----|--------------------------------------|-----|
| 1.84      |                                      | 0.5 | -26.0                                 | 0.7 |                                      |     |                                      | 1.9 |
| 2.22      | -28.0                                | 0.7 | -25.3                                 | 0.4 | -26.7                                | 0.3 | -26.9                                | 0.4 |
| 2.47      | -29.1                                | 0.1 | -26.7                                 | 0.2 | -28.3                                | 0.3 | -27.1                                | 0.2 |
| 3.00      | -28.5                                | 0.2 | -24.9                                 | 0.0 | -25.8                                | 1.2 | -26.6                                | 0.2 |
| 3.05      | -28.6                                | 0.4 | -26.7                                 | 0.3 |                                      | 0.3 | -27.3                                | 0.1 |
| 3.09      | -26.3                                | 0.1 | -24.4                                 | 0.3 | -30.3                                | 0.3 | -25.7                                | 0.4 |
| 3.13      | -27.4                                | 0.0 | -25.5                                 | 0.3 | -30.7                                | 0.2 | -26.5                                | 0.0 |
| 3.16      |                                      |     | -25.0                                 | 0.0 |                                      |     |                                      | 3.6 |
| 3.20      | -28.8                                | 0.2 | -26.2                                 | 0.1 | -27.5                                | 0.2 | -26.3                                | 0.1 |
| 3.24      | -28.0                                | 0.3 | -24.7                                 | 0.2 | -26.7                                | 0.1 | -26.3                                | 0.0 |
| 3.27      | -28.0                                | 0.3 | -25.8                                 | 0.7 | -26.2                                | 2.1 | -27.1                                | 0.7 |
| 3.31      |                                      | 0.4 | -26.8                                 | 0.3 |                                      | 1.6 | -28.1                                | 0.9 |
| 3.38      | -28.9                                | 0.4 | -25.8                                 | 0.1 | -27.0                                | 0.3 | -27.1                                | 0.4 |
| 3.42      |                                      | 0.7 | -27.2                                 | 0.4 |                                      |     | -29.1                                | 1.1 |
| 3.54      | -28.5                                | 0.6 | -25.2                                 | 0.4 |                                      | 3.8 | -27.2                                | 0.0 |
| 3.64      | -35.0                                | 0.5 | -26.2                                 | 0.1 | -35.8                                | 0.2 | -28.0                                | 0.4 |
| 3.74      | -32.0                                | 0.6 | -24.2                                 | 0.7 | -34.4                                | 0.0 | -25.2                                | 0.4 |
| 3.85      | -34.6                                | 0.2 | -26.2                                 | 0.3 | -35.6                                | 1.1 | -27.2                                | 0.1 |
| 3.95      | -28.5                                | 0.0 | -25.9                                 | 0.0 | -28.9                                | 2.0 | -25.8                                | 0.0 |
| 4.35      | -35.5                                | 1.3 | -26.8                                 | 0.7 | -35.6                                | 0.2 | -28.2                                | 1.4 |
| 4.76      | -32.9                                | 0.1 | -23.4                                 | 0.2 | -34.5                                | 0.4 | -24.9                                | 0.1 |
| 5.16      | -38.4                                | 0.2 | -27.2                                 | 0.1 | -37.9                                | 0.0 | -28.5                                | 0.1 |
| 5.57      |                                      |     | -26.9                                 | 0.0 |                                      |     |                                      |     |
| 5.97      | -31.6                                | 1.0 | -22.5                                 | 0.2 | -35.9                                | 0.2 | -23.9                                | 0.1 |
| 6.38      |                                      | 0.2 | -24.2                                 | 0.8 |                                      | 0.5 |                                      | 0.5 |
| 6.78      | -26.8                                | 0.3 | -24.7                                 | 0.0 |                                      | 0.7 | -25.2                                | 0.2 |
| 7.19      | -37.7                                | 1.4 | -26.9                                 | 0.8 | -37.4                                | 0.6 | -27.5                                | 0.8 |
| 7.47      |                                      | 0.7 | -28.0                                 | 0.5 |                                      | 8.8 |                                      | 0.1 |
| 7.85      | -26.0                                | 0.2 | -24.7                                 | 0.0 | -28.1                                | 0.5 | -24.8                                | 0.1 |
| 7.95      | -35.5                                | 0.0 | -25.8                                 | 0.2 | -36.8                                | 0.1 | -27.5                                | 0.1 |
| 8.05      | -35.1                                | 0.6 | -25.7                                 | 0.8 | -36.8                                | 0.4 | -27.4                                | 0.3 |
| 8.26      | -28.4                                | 0.1 | -25.6                                 | 0.2 |                                      | 0.4 | -27.0                                | 0.0 |
| 8.36      | -35.1                                | 0.4 | -25.5                                 | 0.2 | -37.8                                | 0.4 | -26.4                                | 0.2 |
| 8.46      | -37.6                                | 0.3 | -27.1                                 | 0.5 | -40.7                                | 5.3 | -28.8                                | 0.0 |
| 8.66      | -29.2                                | 0.5 | -26.9                                 | 0.2 |                                      | 1.7 | -27.2                                | 0.7 |
| 8.93      | -29.1                                | 0.0 | -24.9                                 | 0.2 |                                      | 0.2 | -26.7                                | 0.3 |
| 9.37      |                                      | 0.1 | -25.9                                 | 0.1 |                                      |     |                                      | 5.6 |
| 9.55      |                                      | 0.6 | -27.1                                 | 0.2 |                                      | 0.3 |                                      | 3.6 |
| 9.64      | -28.1                                | 0.2 | -24.7                                 | 0.1 | -26.1                                | 0.1 | -26.0                                | 0.1 |



---

|       |       |     |       |     |       |     |       |     |
|-------|-------|-----|-------|-----|-------|-----|-------|-----|
| 9.68  |       |     | -27.0 | 0.0 |       |     |       |     |
| 9.69  |       | 0.0 | -26.1 | 0.2 |       | 0.1 |       | 0.2 |
| 9.71  | -28.5 | 0.1 | -25.3 | 0.1 |       | 0.8 | -26.4 | 0.8 |
| 9.74  | -28.7 | 0.3 | -26.5 | 0.2 |       |     |       | 0.5 |
| 9.77  | -29.1 | 0.2 | -25.7 | 0.0 | -26.7 | 0.2 | -27.7 | 0.0 |
| 9.81  | -29.1 | 0.5 | -26.6 | 0.0 |       | 0.1 | -26.1 | 0.2 |
| 9.84  | -28.5 | 0.4 | -25.7 | 0.0 |       | 0.6 | -26.5 | 0.1 |
| 9.87  |       | 1.6 | -25.7 | 0.1 |       | 0.9 | -27.2 | 0.5 |
| 9.90  | -29.7 | 0.1 | -26.1 | 0.5 | -27.9 | 0.5 | -26.5 | 0.8 |
| 9.94  |       | 0.4 | -25.4 | 0.1 |       | 0.4 | -25.8 | 0.2 |
| 10.00 |       | 0.5 | -27.0 | 0.0 |       | 0.5 |       | 0.8 |
| 10.96 | -29.1 | 0.4 | -24.7 | 0.1 |       | 0.1 | -26.8 | 0.0 |
| 11.18 |       | 0.0 | -24.8 | 0.0 |       |     |       | 0.6 |
| 11.27 |       | 0.3 | -25.4 | 0.2 |       | 0.0 |       | 0.6 |
| 11.54 |       | 1.5 | -25.2 | 0.3 |       | 0.2 |       | 1.0 |
| 11.75 |       | 1.0 | -24.4 | 0.3 |       |     |       | 0.0 |
| 11.90 | -35.6 | 0.1 | -26.7 | 0.1 | -39.6 | 0.6 | -28.0 | 0.2 |
| 12.06 |       | 0.1 | -26.4 | 0.1 |       | 0.0 |       | 2.5 |
| 12.21 | -34.7 | 0.4 | -27.0 | 0.1 |       | 0.4 | -28.5 | 0.0 |
| 12.37 | -31.7 | 0.1 | -24.8 | 0.1 | -36.3 | 0.1 | -26.7 | 0.2 |
| 12.52 | -32.3 | 0.1 | -24.8 | 0.2 | -36.5 | 0.2 | -26.8 | 0.1 |
| 12.85 |       | 0.3 | -28.0 | 0.2 |       | 0.0 | -31.8 | 0.2 |
| 12.97 | -35.9 | 0.0 | -26.1 | 0.0 | -37.2 | 0.3 | -28.4 | 0.2 |
| 13.04 | -37.4 | 0.5 | -26.6 | 0.0 | -37.2 | 2.3 | -29.3 | 0.1 |
| 13.12 | -36.1 | 1.0 | -25.9 | 0.1 | -36.0 | 0.2 | -29.1 | 0.3 |
| 13.26 |       | 0.5 | -26.3 | 0.1 |       | 0.5 |       | 0.0 |
| 13.60 | -33.3 | 0.0 | -25.2 | 0.0 | -35.7 | 0.7 | -28.9 | 0.5 |
| 13.94 |       | 0.7 | -27.2 | 0.6 |       |     |       | 0.6 |
| 14.27 | -35.2 | 0.6 | -25.6 | 0.3 | -36.5 | 0.7 | -29.6 | 0.5 |
| 14.61 |       | 1.0 | -27.1 | 0.4 |       | 0.1 |       | 0.1 |
| 14.78 |       | 0.3 | -27.0 | 0.3 |       | 1.0 |       | 0.3 |
| 15.12 | -32.0 | 0.3 | -28.2 | 0.2 |       | 0.1 | -30.5 | 0.1 |
| 16.01 |       | 0.4 | -27.9 | 1.0 |       | 0.1 |       | 0.1 |
| 16.41 | -30.2 | 0.3 | -27.3 | 0.2 |       | 0.1 |       | 0.1 |
| 16.57 |       | 1.1 | -30.4 | 0.2 |       | 0.3 |       | 0.2 |
| 16.64 |       |     | -27.9 | 0.2 |       |     |       |     |
| 16.79 | -33.8 | 0.1 | -28.3 | 0.2 | -29.1 | 0.2 | -31.4 | 0.3 |
| 16.90 |       | 0.5 | -27.6 | 0.0 |       | 0.4 |       | 0.5 |
| 17.31 | -29.5 | 0.4 | -26.5 | 0.1 | -28.3 | 0.1 | -29.4 | 0.2 |
| 17.43 |       | 0.2 | -29.7 | 2.0 |       | 0.4 |       | 0.4 |
| 17.54 |       | 1.6 | -30.9 | 0.5 |       | 0.8 | -34.7 | 0.2 |

---



**Supplementary Table 5. Results of <sup>14</sup>C AMS dating in ZK-5 core.**

| Lab code | AMS code | Depth/cm | <sup>14</sup> C age/error | Cal age (BP*) |
|----------|----------|----------|---------------------------|---------------|
| DJH-24   | 432094   | 24       | 2860±30                   | 3066–2917     |
| DJH-49   | 369149   | 49       | 3220±30                   | 3484–3375     |
| DJH-54   | 432095   | 54       | 3630±30                   | 3993–3857     |
| DJH-62   | 467928   | 62       | 6250±30                   | 7057–7027     |
| DJH-64   | 432096   | 64       | 6920±30                   | 7800–7681     |
| DJH-74   | 385688   | 74       | 7920±30                   | 8798–8627     |
| DJH-88   | 381457   | 88       | 8560±40                   | 9561–9478     |
| DJH-121  | 369150   | 121      | 8980±50                   | 10238–10116   |
| DJH-123  | 381458   | 123      | 8990±40                   | 10239–10128   |
| DJH-129  | 425598   | 129      | 9620±30                   | 10975–10787   |
| DJH-145  | 425481   | 145      | 10090±40                  | 11830–11402   |
| DJH-159  | 425599   | 159      | 10890±40                  | 12819–12700   |
| DJH-161  | 393241   | 161      | 11070±30                  | 13047–12817   |
| DJH-170  | 369151   | 170      | 11420±40                  | 13357–13145   |
| DJH-181  | 381459   | 181      | 12700±50                  | 15304–14895   |
| DJH-189  | 425600   | 189      | 13260±40                  | 16109–15763   |
| DJH-195  | 390115   | 195      | 13560±40                  | 16539–16164   |
| DJH-217  | 421870   | 217      | 13780±50                  | 16918–16415   |
| DJH-255  | 381460   | 255      | 14590±50                  | 17952–17598   |
| DJH-293  | 425601   | 293      | 17010±50                  | 20692–20323   |

\* BP: before the present (1950 AD).

### **Supplementary Note 1**

#### **Evaporation difference between the Dajiuhu peatland and Sanbao cave**

Compared with the Dajiuhu peatland, the Sanbao cave is less affected by evaporation. This cave is located at a relatively high elevation (1900 m above the sea level), with deeper overlying soil and dense forest cover. Here the precipitation has a relatively short residence time in the uppermost soil, which might escape, to some extent, the influence of evaporation. Further evidence that evaporation shows little effect on stalagmite  $\delta^{18}\text{O}$  in Sanbao site is that Holocene stalagmite  $\delta^{18}\text{O}$  sequences show high consistency from southwest China to northeast China, spanning a distance of >2000 km and encompassing quite different climate zones<sup>4</sup>.

### Supplementary References:

1. Talbot, H.M., Bischoff, J., Inglis, G.N., Collinson, M.E., Pancost, R.D. Polyfunctionalised bio- and geohopanoids in the Eocene Cobham Lignite. *Org. Geochem.* **96**, 77-92 (2016).
2. Huang, X., Meyers, P.A., Xue, J., Gong, L., Wang, X., Xie, S. Environmental factors affecting the low temperature isomerization of homohopanes in acidic peat deposits, central China. *Geochim. Cosmochim. Acta* **154**, 212-228 (2015).
3. Blaauw, M. Methods and code for 'classical' age-modelling of radiocarbon sequences. *Quarter. Geochronol.* **5**, 512-518 (2010).
4. Liu, Z., Wen, X., Brady, E.C., Otto-Bliesner, B., Yu, G., Lu, H., Cheng, H., Wang, Y., Zheng, W., Ding, Y., Edwards, R.L., Cheng, J., Liu, W., Yang, H. Chinese cave records and the East Asia summer monsoon. *Quat. Sci. Rev.* **83**, 115-128 (2014).
